1 **Pro-Resolving Mediator Profiles And 5-Lipoxygenase Activity In Cerebrospinal**  
2 **Fluid Correlate with Disease Severity and Outcome in Adults with Tuberculous**  
3 **Meningitis**

4

5

6 Romain A. Colas<sup>1\*</sup>, Le Thanh Hoang Nhat<sup>2\*</sup>, Nguyen Thuy Thuong Thuong<sup>2</sup>, Esteban  
7 Alberto Gomez Cifuentes<sup>1</sup>, Lucy Ly<sup>1</sup>, Hai Hoang Thanh<sup>2</sup>, Nguyen Hoan Phu<sup>2</sup>, Nguyen  
8 Thi Hoang Mai<sup>2</sup>, Guy E. Thwaites<sup>2,3,\$</sup> and Jesmond Dalli<sup>1,4,\$,+</sup>.

9

10 <sup>1</sup>William Harvey Research Institute, Barts and The London School of Medicine and  
11 Dentistry, Queen Mary University of London, Charterhouse Square, London, EC1M  
12 6BQ UK.

13 <sup>2</sup>Oxford University Clinical Research Unit, Ho Chi Minh City, Vietnam

14 <sup>3</sup>Centre for Tropical Medicine and Global Health, Nuffield Department of Medicine,  
15 University of Oxford, Oxford, UK

16 <sup>4</sup> Centre for Inflammation and Therapeutic Innovation, Queen Mary University of  
17 London, London, UK.

18

19 \* Equal first authorship

20 \$ Equal senior authorship

21

22 <sup>+</sup>Corresponding author: Dr Jesmond Dalli Ph.D, William Harvey Research Institute,  
23 John Vane Science Centre, Charterhouse Square, London. EC1M 6BQ. E-mail:  
24 [j.dalli@qmul.ac.uk](mailto:j.dalli@qmul.ac.uk), Tel: +44 (0) 207 882 8263

25 **Short Title:** Relationships between SPM levels and outcomes in Tuberculous  
26 meningitis

27 **Keywords:** Tuberculous meningitis, Resolution, essential fatty acids, eicosanoids,  
28 aspirin

29 **Abstract**

30 Tuberculous meningitis (TBM) is the most lethal form of tuberculosis infection,  
31 characterized by a dysregulated immune response that frequently leads to  
32 neurological injury and death despite the best available treatment. The mechanisms  
33 driving the inflammatory response in TBM are not well understood. To gain insights  
34 into these mechanisms we used a lipid mediator profiling approach to investigate the  
35 regulation of a novel group of host protective mediators, termed specialized pro-  
36 resolving mediators (SPM), in the cerebrospinal fluid (CSF) of adults with TBM  
37 enrolled into a randomised placebo-controlled trial of adjunctive aspirin treatment.  
38 We found distinct lipid mediator profiles with increasing disease severity, changes  
39 that were linked with an upregulation of inflammatory eicosanoids in patients with  
40 severe TBM and a decrease in the production of a number of 5-lipoxygenase  
41 (ALOX5)-derived SPM. CSF pro-resolving mediator concentrations were also  
42 associated with 80-day survival. In survivors, we found a significant increase in pro-  
43 resolving mediator concentrations, including the ALOX5-derived resolvin (Rv)T2,  
44 RvT4 and 15-epi-Lipoxin (LX)B<sub>4</sub>, compared to those who died. Aspirin administration  
45 increased the ratio of pro-resolving to pro-inflammatory mediators decreasing the  
46 concentrations of the prothrombic mediator TxA<sub>2</sub>, changes that were linked with early  
47 reductions in brain infarcts and deaths. Together, these findings identify a CSF SPM  
48 signature that is associated with disease severity and 80-day mortality in TBM.  
49 Furthermore, the therapeutic manipulation of the ratio between pro-resolving  
50 mediators and pro-inflammatory/thrombogenic mediators in the CSF, by aspirin for  
51 example, offers a novel treatment strategy to reduce the morbidity and mortality  
52 caused by TBM.  
53

54 **Authors Summary**

55 Infections of the brain and the meninges by *Mycobacterium tuberculosis* (*M. tb*) lead  
56 to severe inflammation and are associated with poor outcomes. The mechanisms  
57 leading to this disease remain poorly defined. Herein, we investigated how *M. tb*  
58 infection regulates the concentrations of specialized pro-resolving mediators that are  
59 central in controlling the body's ability to clear infections. In these investigations, we  
60 found that disease survival was linked with increased concentrations of a number of  
61 these protective molecules including resolvins and lipoxins. Treatment of *M. tb*-  
62 infected patients with aspirin decreased the production of the immunosuppressive  
63 and thrombogenic mediator thromboxane A<sub>2</sub> improving the balance between  
64 protective and inflammatory molecules. Of note, these changes were linked with  
65 reduced disease severity and improved survival. Therefore, the present findings  
66 suggest a previously unappreciated role for pro-resolving mediators in TBM  
67 pathogenesis.

## 68 **Introduction**

69 *Mycobacterium tuberculosis* (*M. tb*) is responsible for more deaths globally than any  
70 other infectious disease. When it infects the brain and meninges to cause  
71 tuberculous meningitis (TBM), which represents 1-5% of all forms of tuberculosis, it  
72 either kills or severely disables around a half of all sufferers despite the best  
73 available treatment (1). The pathogenesis of TBM is not well understood, but poor  
74 outcomes have been linked to dysregulated intracerebral inflammation (2). Current  
75 therapeutic approaches are aimed at killing *M. tb* infecting the brain or controlling the  
76 inflammatory response (3, 4). To date, the latter has primarily involved adjunctive  
77 corticosteroid therapy and has been associated with increased survival, although  
78 how corticosteroids modulate intra-cerebral inflammation to influence outcomes  
79 remains uncertain (5).

80 It is now well established that under ideal conditions the body activates  
81 evolutionarily conserved programs to terminate inflammation and promote the repair  
82 and regeneration of damaged tissues (6). At the helm of these programs is a recently  
83 uncovered genus of mediators produced *via* the stereoselective conversion of  
84 essential fatty acids and termed specialized pro-resolving mediators (SPM). These  
85 mediators include the arachidonic acid (AA)-derived lipoxins and the n-3  
86 docosapentaenoic acid (DPA)-derived resolvins, protectins and maresins (6). Recent  
87 studies demonstrate that SPM *via* the activation of cognate receptors regulate the  
88 phagocytosis and killing of bacteria during infections. They counter regulate the  
89 production of pro-inflammatory mediators including cytokines and eicosanoids, and  
90 control both leukocyte trafficking and phenotype (7-11). These autacoids also  
91 mediate the protective actions of several widely used therapeutics, including  
92 atorvastatin, pravastatin and aspirin (7, 12, 13).

93 We recently tested the hypothesis that the addition of aspirin to standard TBM  
94 treatment (anti-tuberculosis drugs and corticosteroids) may further improve outcomes  
95 by inhibiting thromboxane A<sub>2</sub> (TxA<sub>2</sub>) and preventing brain infarcts (a common life-

96 threatening complication of TBM), and by enhancing the resolution of intra-cerebral  
97 inflammation through the increased expression of SPMs (14). The trial found that in  
98 patients with microbiologically confirmed TBM, aspirin was associated with reduced  
99 brain infarcts and/or death in the first 60 days of treatment.

100 Little is known about the regulation of lipid mediators, and in particular SPM,  
101 in the cerebrospinal fluid (CSF) during TBM. Thus, in the present studies we  
102 investigated whether CSF lipid mediator concentrations were altered with increasing  
103 disease severity. We found that concentrations of a number of SPM families were  
104 reduced with increasing disease severity. This was linked with an upregulation of  
105 inflammation-initiating eicosanoids, including prostaglandins and cystenyl  
106 leukotrienes. Pre-treatment CSF lipid mediator concentrations were also found to be  
107 predictive of outcome with distinct lipid mediator profiles obtained in those patients  
108 that were alive at the end of the study versus those that died during the study.  
109 Finally, we also found that in aspirin-treated patients there was a dose-dependent  
110 alteration of the CSF lipid mediator profiles improving the balance between pro-  
111 resolving and pro-inflammatory/pro-thrombogenic mediators.

112

113

114

## 115 **Results**

### 116 **Increased disease severity is associated with a reduction in CSF SPM**

#### 117 **concentrations**

118 In order to determine whether there was a relationship between CSF lipid mediator  
119 concentrations and disease severity in TBM we investigated lipid mediator profiles of  
120 patients recruited to the Aspirin TBM study (NCT02237365). Here CSF was collected  
121 from enrolled patients with known or suspected TBM just prior to the start of  
122 treatment in a randomised comparison of aspirin versus placebo as an adjunct to  
123 dexamethasone administration for the first 60 days of TBM treatment (14). Disease  
124 severity was assessed using the Medical Research Council grade (15) that uses  
125 Glasgow coma score and focal neurological deficits to categorise disease severity as  
126 mild (grade 1), moderate (grade 2), or severe (grade 3; See Supplemental Table 1  
127 for patient information). Using targeted liquid chromatography-tandem mass  
128 spectrometry (LC-MS/MS)-based profiling of CSF we identified mediators from all  
129 four major bioactive metabolomes, including the AA-derived lipoxin (LX)s, leukotriene  
130 (LT)s and prostaglandin (PG)s and the n-3 DPA, eicosapentaenoic acid (EPA) and  
131 docosahexaenoic acid (DHA)-derived resolvin (Rv)s (Supplemental Table 2). In order  
132 to gain insights into the relationship between CSF lipid mediator concentrations and  
133 disease severity we first grouped the mediators by biological function assessing the  
134 differences between pro-resolving mediators (lipoxins, resolvins, protectins and  
135 maresins) and pro-inflammatory mediators (leukotrienes, prostaglandins and  
136 thromboxane) in patients with moderate or severe disease (MRC grades 2 and 3)  
137 when compared with those with mild disease (MRC grade 1)(16)(Figure 1A,  
138 Supplemental Table 2). Results of this analysis demonstrated that with increasing  
139 disease severity there was a decrease in overall pro-resolving lipid mediator  
140 concentrations in the CSF of patients with TBM (Figure 1A). This relationship was  
141 coupled with a trend towards an increase in the concentrations of pro-inflammatory  
142 mediators in those with more severe disease (Figure 1B). Assessment of the

143 resolution index, that is the ratio between the concentrations of pro-resolving  
144 mediators and pro-inflammatory eicosanoids, (16) also demonstrate a reduction in  
145 the resolution index, indicative of increased inflammation, in patients with the more  
146 severe disease (Figure 1C).

147 In order to gain further insights into the mediator pathways that were  
148 differentially regulated between these patient groups we next interrogated the  
149 biosynthetic pathways for each of the essential fatty acid metabolomes. This  
150 demonstrated that in patients with an MRC score of 2 and 3, when compared with  
151 patients with an MRC score of 1, there was a significant reduction in two pro-  
152 resolving mediator families, the n-3 docosapentaenoic acid-derived resolvins (RvD<sub>n-3</sub>  
153 DPA) and the arachidonic acid-derived lipoxins (LX). This was coupled with a  
154 significant increase in the pro-inflammatory arachidonic acid-derived prostaglandins  
155 (PG) and leukotrienes (LT; Figure 1D).

156 We next employed Partial Least Squares Discriminant Analysis (PSL-DA), a  
157 regression model that identifies variables that contribute to the separation of  
158 experimental groups, to investigate the relationship between lipid mediator profiles  
159 (i.e. the concentrations of individual mediators identified in the CSF) and disease  
160 severity. This analysis demonstrated that the individual lipid mediator concentrations  
161 were markedly different between patients with MRC grades 1, 2 and 3 as  
162 demonstrated by the distinct clustering of patients from the different disease severity  
163 groups (Figure 2A). Assessment of the variable importance in projection (VIP)  
164 scores, which identify the contribution of each mediator in the observed separation  
165 between each of the groups, identified 24 mediators that had a VIP score greater  
166 than 1, showing that they were differentially regulated depending on disease severity  
167 (Figure 2A). Amongst the mediators found to be differentially regulated between  
168 these three disease groups were several ALOX5-derived mediators that are involved  
169 in coordinating the host response to clear bacterial infections, including RvT4, RvD1  
170 and RvE1 (Figure 2B)(7, 17, 18).

171           Having identified that there was a differential regulation of lipid mediator  
172 profiles with increasing disease severity we next assessed the association between  
173 distinct lipid mediators and disease severity. There was a significant negative  
174 correlation between a select group of pro-resolving mediators, 15-epi-LXB<sub>4</sub>, RvD2<sub>n-3</sub>  
175 <sub>DPA</sub>, 22-OH-PD1, MaR1 and 15-epi-LXA<sub>4</sub>, and increasing disease severity (Figure 2C  
176 and Supplemental Table 2). In addition, we also observed increased concentrations  
177 of LTE<sub>4</sub>, the terminal product in the cysteinyl leukotriene biosynthetic metabolome  
178 and that was recently found to be also bioactive (19), with increasing disease  
179 severity, although the correlation was not statistically significant after correction for  
180 multiple testing (Figure 2C, Supplemental Table 2).

181           To further validate the potential utility of these mediators as biomarkers of  
182 disease severity we conducted multiple regression analysis, using Least Absolute  
183 Shrinkage and Selection Operator (LASSO) regression analysis. This demonstrated  
184 that decreased concentrations of identified pro-resolving mediators, primarily 15-epi-  
185 LXB<sub>4</sub>, LXB<sub>4</sub>, PGE<sub>2</sub>, 22-OH-PD1, were associated with increased disease severity  
186 (Supplementary Table 3).

187           Given the role that immune cells play in the biosynthesis of lipid mediators (7,  
188 9), we next investigated whether disease severity influenced CSF leukocyte  
189 numbers. Here we found that cell numbers were reduced in those with more severe  
190 disease, from 416±53 cells/mm<sup>3</sup> in patients with an MRC score of 1, to 239±27  
191 cells/mm<sup>3</sup> and 164±39 cells/mm<sup>3</sup> in patients with an MRC score of 2 and 3  
192 respectively, although these changes were not statistically significant ( $p>0.05$ ). We  
193 next assessed whether there was an association between CSF leukocyte counts and  
194 the concentrations for each of the identified LM families. With adjustment for multiple  
195 testing, no significant correlations were found between these parameters (data not  
196 shown), suggesting that the observed difference may be due to a differential  
197 activation of the leukocyte population.

198



199 **Pre-treatment SPM and eicosanoid concentrations in CSF correlate with**  
200 **mortality**

201 Having found SPM concentrations were associated with TBM disease severity we  
202 investigated whether CSF lipid mediator concentrations correlated with mortality (See  
203 Supplemental Table 4 for patient information). We first assessed the CSF  
204 concentrations of SPM and pro-inflammatory eicosanoids, finding that SPM  
205 concentrations were significantly reduced in patients that died during the study, while  
206 pro-inflammatory mediator concentrations tended to be higher in those who survived,  
207 although this did not reach statistical significance (Figure 3A,B and Supplemental  
208 Table 5). Of note, comparison of the resolution index in survivors and those who died  
209 demonstrated a significantly higher CSF resolution index in survivors (Figure 3C),  
210 suggesting that disruption of pro-resolving mediator production and a concomitant  
211 increase in pro-inflammatory eicosanoid production are linked with outcome from  
212 TBM.

213 We next conducted lipid mediator biosynthetic pathway analysis to evaluate  
214 which pathways are contributing to the observed differences in lipid mediator  
215 concentrations. This demonstrated that there was a downregulation in the expression  
216 of 13-series resolvins (RvT), RvD<sub>n-3</sub> DPA, and LX with an upregulation in the pro-  
217 inflammatory LT in non-survivors when compared with survivors (Figure 3D).

218 Orthogonal PLS-DA (OPLS-DA) analysis of CSF lipid mediator profiles  
219 provided further support for the differences in lipid mediator concentrations between  
220 those who died and those who survived, with CSF lipid mediator concentrations from  
221 each of these patient groups giving two distinct clusters (Figure 4A). This separation  
222 between the two groups was linked with a differential regulation of 18 lipid mediators,  
223 which gave a VIP score greater than 1 and included MaR2, RvT2 and 15-epi-LXB<sub>4</sub>.  
224 Of note, RvT2 and 15-epi-LXB<sub>4</sub> activate the innate immune response to clear  
225 bacterial infections and counter-regulate the production of pro-inflammatory  
226 mediators (6, 7). Statistical assessment of mediators found to be differentially

227 regulated demonstrated that the concentrations of MaR2, RvT2 and 15-epi-LXB<sub>4</sub>  
228 were significantly lower in non-survivors when compared with survivors  
229 (Supplemental Table 5 and Figure 4B). Out of these mediators 15-epi-LXB<sub>4</sub> was  
230 found to be significantly reduced after multiple correction. This lipid mediator was  
231 also a strong predictor of mortality in TBM as demonstrated by LASSO regression  
232 analysis (Supplemental Table 6).

233

### 234 **Aspirin administration upregulates CSF concentrations of select pro-resolving** 235 **mediators during TBM**

236 We recently reported that treatment with aspirin, dexamethasone and anti-  
237 tuberculosis drugs was associated with reduction in new brain infarcts and deaths  
238 within 60 days in patients with microbiologically confirmed TBM (14). Therefore, we  
239 investigated the impact of aspirin on CSF lipid mediator pathways in this patient sub-  
240 population. We compared lipid mediator profiles obtained after 30 days of aspirin  
241 (1000mg/day or 81mg/day) or placebo (Supplementary Table 7). Assessment of  
242 overall lipid mediators by function demonstrated a decrease in the concentrations of  
243 proinflammatory eicosanoids and an overall increase in the resolution index of  
244 patients given 1000mg of aspirin when compared with those receiving placebo  
245 (Figure 5A-C). However, these changes did not reach statistical significance.

246 Pathway analysis of lipid mediator families identified in the CSF of these patients  
247 demonstrated a trend towards the upregulation of a number of pro-resolving families  
248 that included the RvD<sub>n-3</sub> DPA and MaR<sub>n-3</sub> DPA in patients receiving 1000mg and 81mg  
249 aspirin respectively, although these changes did not reach statistical significance (n=  
250 28 for patients in 81mg aspirin group, n = 27 patients in 1000mg aspirin group and  
251 n= 34 patients in placebo group).

252 To further evaluate the regulation of CSF lipid mediator concentrations by  
253 aspirin we conducted OPLS-DA. This analysis demonstrated that while day 30 CSF  
254 lipid mediator profiles between the 81mg and placebo groups were not markedly

255 different, lipid mediator profiles from patients given 1000mg aspirin gave distinct  
256 clusters to that from patients given placebo (Figure 5D,E). This separation between  
257 the two patient groups was linked with a differential regulation of 18 mediators from  
258 all the four bioactive metabolomes, including RvT4 and TxB<sub>2</sub>, the inactive breakdown  
259 product of the prothrombotic TxA<sub>2</sub> (20)(Figure 5E). Statistical assessment of their  
260 concentrations in CSF demonstrated that after 30 days TxB<sub>2</sub> was reduced with both  
261 81 mg and 1000mg of aspirin, reaching statistical significance in those given 1000mg  
262 after correcting for multiple testing (Supplemental Table 8,9).  
263

## 264 **Discussion**

265 In the present study we investigated the regulation of CSF lipid mediator profiles  
266 before and during the treatment of adults with TBM. We found that pre-treatment  
267 disease severity was associated with the concentrations of both inflammatory and  
268 pro-resolving mediators, with more severe disease linked to lower SPM  
269 concentrations and increased concentrations of immunosuppressive,  
270 vasoconstrictive and nociceptive eicosanoids. Pre-treatment SPM concentrations  
271 were also associated with 80-day mortality, with survivors having higher  
272 concentrations of several SPM families, including the ALOX5-derived Rvs and LXs,  
273 compared to those who died. Aspirin co-administration with dexamethasone was  
274 observed to increase the CSF resolution index after 30 days of treatment, and  
275 decrease TxB<sub>2</sub> concentrations.

276         Recent decades have seen significant advances in our ability to manage  
277 patients with TBM, however, morbidity and mortality remain high (1). This is at least  
278 part due to our limited understanding of the underlying mechanisms that perpetuate  
279 inflammation within the CNS leading to disability and ultimately death despite the  
280 best available treatment. In the present studies we investigated the relationship  
281 between disease severity and local mediator biosynthesis. Results from these  
282 analysis demonstrate that even prior to the initiation of treatment patients that died  
283 during the course of the study presented with a profound dysregulation in both  
284 protective and inflammatory mediator pathways.

285         Lipid mediator biosynthesis is a tightly coordinated process where essential  
286 fatty acids are sequentially oxygenated, primarily by lipoxygenase and  
287 cyclooxygenase enzymes, to produce stereochemically defined and structurally  
288 unique products (6, 21). Regulation of these biosynthetic enzymes occurs at both a  
289 transcriptional/translational level as well as via post-translational modifications.  
290 Recent studies demonstrate that nitric oxide synthase promotes the S-nitrosylation of  
291 COX-2 increasing its catalytic activity and upregulating the production of protective

292 mediators including PGI<sub>2</sub> (22) and RvT (7). On the other hand, the calcium-  
293 calmodulin-dependent protein kinase II - p38 mediated phosphorylation of ALOX5  
294 leads to a switch in the product profile of the enzyme from SPM production to the  
295 formation of leukotrienes (23). The observation that with increasing disease severity  
296 there is a downregulation of ALOX5-derived SPM and a concomitant upregulation in  
297 cysteinyl leukotriene production suggest that as the disease progresses there is an  
298 increase in ALOX5 phosphorylation that leads to an alteration in the product profile of  
299 the enzyme.

300 Leukocytes play an important role in the biosynthesis of lipid mediators, with  
301 their product profile reflecting their activation status (23-25). Different macrophage  
302 subsets, for example, display distinct lipid mediator profiles with monocyte-derived-  
303 macrophages skewed towards a classic phenotype expressing higher amounts of  
304 pro-inflammatory eicosanoids, whereas cells with an alternatively activated  
305 phenotype display higher concentrations of pro-resolving mediators (23-25). This  
306 shift is also linked with a differential expression of both lipid mediator biosynthetic  
307 enzymes as well as the phosphorylation status of ALOX5 (23, 25, 26). In the present  
308 study we found a decrease in the number of leukocytes in the CSF. However there  
309 was no correlation between leukocyte numbers and lipid mediator concentrations  
310 suggesting that regulation of enzyme activity, possibly reflecting a shift in leukocyte  
311 phenotype or population, is responsible for the altered lipid mediator concentrations.

312 Studies conducted by Vane and colleagues demonstrate that aspirin inhibits  
313 the production of prostaglandins and thromboxane, a mechanism that is dependent  
314 on the acetylation of COX-1 and COX-2 (27). Later investigations by Serhan and  
315 colleagues found that acetylation of COX-2 also led to a switch in the catalytic activity  
316 of the enzyme, from the production of PGG<sub>2</sub> to the formation of epimeric forms of  
317 resolvins, lipoxins and protectins (28, 29). In the preset study we did not observe  
318 significant increases in these epimeric forms of the SPM in the CSF of TBM patients  
319 treated with aspirin. This may be because the present study was not adequately

320 powered for this analysis or because at the interval tested, i.e. 30 days post initiation  
321 of treatment, the biosynthetic pathways leading to the formation of these molecules  
322 were downregulated. Future studies powered to interrogate this question will need to  
323 establish whether daily regulation of high dose aspirin downregulates these  
324 pathways in the CSF. Of note, we found high dose aspirin administration reduced  
325 TxB<sub>2</sub> concentrations and was linked with improved outcomes.

326           In summary, the present findings uncover novel mechanisms in the  
327 pathophysiology of TBM that may have relevance to all forms of tuberculosis.  
328 Disease severity is associated with an alteration in lipid mediator expression and a  
329 dysregulation in the production of several SPM pathways; a mechanism that is also  
330 linked with a poor prognosis. This dysregulation was at least in part restored by  
331 aspirin, lending support to the hypothesis that TBM arises from a failure of the host to  
332 engage resolution mechanisms and offering novel treatment strategies.

333 **Materials and Methods**

334 **Clinical study:**

335 The patients in the current study were enrolled in a clinical trial of adjunctive aspirin,  
336 the design and conduct of which have been previously described (14). Briefly, we  
337 conducted a parallel group, double blind, randomised, placebo-controlled trial in HIV-  
338 uninfected adults with TBM to assess the safety and efficacy of either 81 mg or  
339 1000mg aspirin daily for the first 60 days of treatment with standard anti-tuberculosis  
340 drugs and dexamethasone. The trial enrolled in-patients at the Hospital for Tropical  
341 Diseases, a 550-bed tertiary referral hospital in Ho Chi Minh City, Vietnam, and was  
342 approved by the Oxford Tropical Research Ethics Committee and the Institutional  
343 Review Board of the Hospital for Tropical Diseases and the Ethical Committee of the  
344 Ministry of Health, Vietnam. Adults ( $\geq 18$  years old) with suspected TBM (at least 5  
345 days of meningitis symptoms, nuchal rigidity, and CSF abnormalities) and a negative  
346 HIV test were eligible to enter the trial. Written informed consent to participate in the  
347 study was obtained from all participants or from their relatives if the participant could  
348 not provide consent due to incapacity.

349 Lumbar puncture was performed before the start of treatment and on days 30 and 60  
350 as per normal clinical care with CSF archived at  $-80^{\circ}\text{C}$  until later testing. Clinical  
351 progress and neurological and drug-related adverse events were assessed daily until  
352 discharge from hospital and monthly thereafter until 8 months, when a final clinical  
353 assessment was made.

354

355 **Targeted lipid mediator profiling.** All samples were extracted using solid-phase  
356 extraction columns as in (30). Prior to sample extraction, deuterated internal  
357 standards, representing each region in the chromatographic analysis (500 pg each)  
358 were added to facilitate quantification in 4V of cold methanol. Samples were kept at -  
359  $20^{\circ}\text{C}$  for a minimum of 45 min to allow protein precipitation. Supernatants were  
360 subjected to solid phase extraction, methyl formate and methanol fractions were

361 collected, brought to dryness and suspended in phase (methanol/water, 1:1, vol/vol)  
362 for injection on a Shimadzu LC-20AD HPLC and a Shimadzu SIL-20AC autoinjector,  
363 paired with a QTrap 6500 plus (Sciex). For identification and quantitation of products  
364 eluted in the methyl formate, an Agilent Poroshell 120 EC-C18 column (100 mm x 4.6  
365 mm x 2.7  $\mu$ m) was kept at 50°C and mediators were eluted using a mobile phase  
366 consisting of methanol-water-acetic acid of 20:80:0.01 (vol/vol/vol) that was ramped to  
367 50:50:0.01 (vol/vol/vol) over 0.5 min and then to 80:20:0.01 (vol/vol/vol) from 2 min to  
368 11 min, maintained till 14.5 min and then rapidly ramped to 98:2:0.01 (vol/vol/vol) for  
369 the next 0.1 min. This was subsequently maintained at 98:2:0.01 (vol/vol/vol) for 5.4  
370 min, and the flow rate was maintained at 0.5 ml/min. QTrap 6500+ was operated in  
371 negative ionization mode using a multiple reaction monitoring method as in (30).

372 In the analysis of peptide-lipid conjugated mediators eluted in the methanol  
373 fraction, an Agilent Poroshell 120 EC-C18 column (100 mm x 4.6 mm x 2.7  $\mu$ m) was  
374 kept at 50°C and mediators were eluted using a mobile phase consisting of methanol-  
375 water-acetic acid at 55:45:0.1 (vol:vol:vol) over 5 min, that was ramped to 80:20:0.1  
376 (vol:vol:vol) for 2 min, maintained at 80:20:0.1 (vol:vol:vol) for the next 3 min and  
377 ramped to 98:2:0.1 (vol:vol:vol) over 3 min. This was kept at 98:2:0.1 (vol:vol:vol) for 3  
378 min. A flow rate of 0.65 ml/min was used throughout the experiment. QTrap 6500+ was  
379 operated in positive ionization mode using scheduled multiple reaction monitoring  
380 (MRM) coupled with information-dependent acquisition and enhanced product ion  
381 scan (30).

382 Each LM was identified using established criteria including matching retention time to  
383 synthetic and authentic materials and at least 6 diagnostic ions (30). Calibration curves  
384 were obtained for each using synthetic compound mixtures at 0.78, 1.56, 3.12, 6.25,  
385 12.5, 25, 50, 100, and 200 pg that gave linear calibration curves with an  $r^2$  values of  
386 0.98–0.99.

387

388 **Statistical analysis.**



389

390 We performed all statistical analyses and data derivation and prepared the  
391 manuscript in R (31), Prism 8 and Microsoft Excel. Results are expressed as mean  
392 and 95% confidence interval or interquartile range as indicated in the figures and  
393 tables. Summary tables of the baseline characteristics of the study population with  
394 respect to disease severity, mortality outcome and treatment allocation as median  
395 (IQR) for continuous data and n (%) for categorical data were provided in the  
396 supplemental document.

397 To assess the overall balance between pro-inflammatory mediators and pro-  
398 resolving mediators in the CSF we combined the concentrations of pro-resolving  
399 mediators, combining the concentrations of the DHA-derived RvD (RvD1, RvD2,  
400 RvD3, RvD4, RvD5, RvD6, 17R-RvD1 and 17R-RvD3) PD (PD1, 10S, 17S-diHDHA,  
401 17R-PD1 and 22-OH-PD1) PCTRs (PCTR1, PCTR2 and PCTR3) and MaR (MaR1,  
402 7S, 14S-diHDHA, MaR2, 4S, 14S-diHDHA and 22-OH-MaR1) MCTRs (MCTR1,  
403 MCTR2 and MCTR3), the n-3 DPA derived RvT (RvT1, RvT2, RvT3 and RvT4),  
404 RvD<sub>n-3 DPA</sub> (RvD1<sub>n-3 DPA</sub>, RvD2<sub>n-3 DPA</sub> and RvD5<sub>n-3 DPA</sub>), PD<sub>n-3 DPA</sub> (PD1<sub>n-3 DPA</sub> and 10S,  
405 17S-diHDPA) and MaR<sub>n-3 DPA</sub> (MaR1<sub>n-3 DPA</sub> and 7S, 14S-diHDPA), the EPA-derived  
406 RvE (RvE1, RvE2 and RvE3) and the AA-derived LX (LXA<sub>4</sub>, LXB<sub>4</sub>, 5S, 15S-diHETE,  
407 15R-LXA<sub>4</sub> and 15R-LXB<sub>4</sub>). Separately we combined the concentrations of pro-  
408 inflammatory eicosanoids: AA-derived LT (LTB<sub>4</sub>, 5S, 12S-diHETE, 12-epi-LTB<sub>4</sub>, 6-  
409 trans, 12-epi-LTB<sub>4</sub> and 20-OH-LTB<sub>4</sub>), cysLT (LTC<sub>4</sub>, LTD<sub>4</sub> and LTE<sub>4</sub>), PG (PGD<sub>2</sub>,  
410 PGE<sub>2</sub> and PGF<sub>2α</sub>) and Tx (TxB<sub>2</sub>). The resolution index was obtained by dividing the  
411 overall concentration of pro-resolving mediators by the overall concentrations of pro-  
412 inflammatory eicosanoids. Investigations into the *flux down each of the mediator*  
413 *families* was conducted by determining the fold change in the concentration of the  
414 different mediator families indicated above, between the control groups (ie MRC1 or  
415 survivors) and test groups (ie MRC2 + MRC3 or non-survivors respectively).

416

417 Statistical differences between the concentrations (expressed as the log<sub>2</sub>-fold  
418 change) of the mediators in each analysis group was determined using Hochberg  
419 Multiple Testing Correction or Benjamini-Hochberg Multiple Testing Correction as  
420 indicated. Lipid mediator networks were constructed using Cytoscape 3.7.1. and the  
421 pathways that were statistically up or down regulated were denoted using red and  
422 blue lines respectively.

423 Investigators were not blinded to group allocation or outcome assessment. The  
424 criterion for statistical significance was  $p \leq 0.05$ . OPLS-DA and PLS-DA (32) were  
425 performed using SIMCA 14.1 software (Umetrics, Umea, Sweden) following mean  
426 centering and unit variance scaling of LM levels. PLS-DA is based on a linear  
427 multivariate model that identifies variables that contribute to class separation of  
428 observations (MRC scores, survivors/non-survivors; Placebo/aspirin groups) on the  
429 basis of their variables (LM levels). During classification, observations were projected  
430 onto their respective class model. The score plot illustrates the systematic clusters  
431 among the observations (closer plots presenting higher similarity in the data matrix).  
432 Loading plot interpretation identified the variables with the best discriminatory power  
433 (Variable Importance in Projection greater than 1) that were associated with the  
434 distinct intervals and contributed to the tight clusters observed in the Score plot.

435 Comparisons of lipid mediators by disease severity (MRC grade) or mortality  
436 outcome were based on the Spearman-test for the test for trend of ordinary groups  
437 for non-normal continuous outcomes. The test were implemented in R package  
438 "Comparegroup". In addition, to identify which lipid mediators are the strong predictor  
439 for disease severity and mortality outcomes in TBM, we performed a Lasso  
440 regression model in which the disease severity or mortality as the outcome, and all  
441 the lipid mediators as the covariates. The lipid mediators which were likely chosen by  
442 the model demonstrated as the strong predictors of the disease severity or mortality  
443 in TBM.

444

445 The reduction of lipid mediator was computed as the difference between the two  
446 timepoints from baseline and day 30. The reduction was compared between  
447 treatment arms based on a simple linear regression. In this model, the lipid mediator  
448 reduction is the outcome and treatment arm is the main covariate. To increase the  
449 power for the analysis, the model was also adjusted for the baseline lipid mediator.  
450 For all the comparison in this study, we performed multiplicity adjustments of p-  
451 values for all comparisons based on Hochberg Multiple Testing Correction, as  
452 implemented in R package “stats”.

453

454

455

456

457 **Acknowledgment**

458 We thank all the patients who took part in the study and the ward nurses and doctors  
459 who cared for them during the trial. We also thank Prof Lalita Ramakrishnan  
460 (University of Cambridge, UK) and Prof Paul Edelstein, (University of Pennsylvania,  
461 USA) for insightful comments and critical review of the manuscript. JD received  
462 funding from the European Research Council (ERC) under the European Union's  
463 Horizon 2020 research and innovation programme (grant no: 677542) and the Barts  
464 Charity (grant no: MGU0343). JD is also supported by a Sir Henry Dale Fellowship  
465 jointly funded by the Wellcome Trust and the Royal Society (grant 107613/Z/15/Z).  
466 GT is supported by a Wellcome Trust Investigator award (grant 110179/Z/15/Z) and  
467 GT, NTHH, THP and NTHM are supported by Wellcome Trust core award to the  
468 Vietnam Asia programme (grant 106680/Z/14/Z).

469

470 **Author Contributions**

471 THP, NTHM recruited and cared for the patients; LTHN and HHT helped to analyse  
472 the data; NTHH helped design the study and coordinated the laboratory assessments  
473 in Vietnam; GT, RAC, LL, EAGC and JD carried out experiments and analysed data;  
474 All authors contributed to manuscript preparation; GT and JD conceived overall  
475 research plan.

476

477 **Declaration of Interests**

478 The authors declare no competing interests.

479

## 480 References

- 481 1. Wilkinson RJ, *et al.* (2017) Tuberculous meningitis. *Nat Rev Neurol*  
482 13(10):581-598.
- 483 2. Thuong NTT, *et al.* (2017) Leukotriene A4 Hydrolase Genotype and HIV  
484 Infection Influence Intracerebral Inflammation and Survival From Tuberculous  
485 Meningitis. *J Infect Dis* 215(7):1020-1028.
- 486 3. Ruslami R, *et al.* (2013) Intensified regimen containing rifampicin and  
487 moxifloxacin for tuberculous meningitis: an open-label, randomised controlled  
488 phase 2 trial. *Lancet Infect Dis* 13(1):27-35.
- 489 4. Heemskerk AD, *et al.* (2016) Intensified Antituberculosis Therapy in Adults  
490 with Tuberculous Meningitis. *N Engl J Med* 374(2):124-134.
- 491 5. Prasad K, Singh MB, & Ryan H (2016) Corticosteroids for managing  
492 tuberculous meningitis. *Cochrane Database Syst Rev* 4:CD002244.
- 493 6. Dalli J & Serhan CN (2017) Immunoresolvents signaling molecules at  
494 intersection between the brain and immune system. *Curr Opin Immunol*  
495 50:48-54.
- 496 7. Dalli J, Chiang N, & Serhan CN (2015) Elucidation of novel 13-series  
497 resolvins that increase with atorvastatin and clear infections. *Nat Med*  
498 21(9):1071-1075.
- 499 8. Chiang N, Dalli J, Colas RA, & Serhan CN (2015) Identification of resolvin D2  
500 receptor mediating resolution of infections and organ protection. *J Exp Med*  
501 212(8):1203-1217.
- 502 9. Gao Y, *et al.* (2015) Female-Specific Downregulation of Tissue  
503 Polymorphonuclear Neutrophils Drives Impaired Regulatory T Cell and  
504 Amplified Effector T Cell Responses in Autoimmune Dry Eye Disease. *J*  
505 *Immunol* 195(7):3086-3099.
- 506 10. Fredman G, *et al.* (2016) An imbalance between specialized pro-resolving  
507 lipid mediators and pro-inflammatory leukotrienes promotes instability of  
508 atherosclerotic plaques. *Nat Commun* 7:12859.
- 509 11. El Kebir D, Gjorstrup P, & Filep JG (2012) Resolvin E1 promotes  
510 phagocytosis-induced neutrophil apoptosis and accelerates resolution of  
511 pulmonary inflammation. *Proc Natl Acad Sci U S A* 109(37):14983-14988.
- 512 12. Maderna P & Godson C (2009) Lipoxins: revolutionary road. *Br J Pharmacol*  
513 158(4):947-959.
- 514 13. Chiang N, Hurwitz S, Ridker PM, & Serhan CN (2006) Aspirin has a gender-  
515 dependent impact on antiinflammatory 15-epi-lipoxin A4 formation: a  
516 randomized human trial. *Arterioscler Thromb Vasc Biol* 26(2):e14-17.
- 517 14. Mai NT, *et al.* (2018) A randomised double blind placebo controlled phase 2  
518 trial of adjunctive aspirin for tuberculous meningitis in HIV-uninfected adults.  
519 *Elife* 7.
- 520 15. Anonymous (1948) STREPTOMYCIN treatment of tuberculous meningitis.  
521 *Lancet* 1(6503):582-596.
- 522 16. Colas RA, *et al.* (2018) Impaired Production and Diurnal Regulation of  
523 Vascular RvDn-3 DPA Increases Systemic Inflammation and Cardiovascular  
524 Disease. *Circ Res*.
- 525 17. Chiang N, *et al.* (2012) Infection regulates pro-resolving mediators that lower  
526 antibiotic requirements. *Nature* 484(7395):524-528.
- 527 18. Oh SF, Pillai PS, Recchiuti A, Yang R, & Serhan CN (2011) Pro-resolving  
528 actions and stereoselective biosynthesis of 18S E-series resolvins in human  
529 leukocytes and murine inflammation. *J Clin Invest* 121(2):569-581.
- 530 19. Bankova LG, *et al.* (2016) Leukotriene E4 elicits respiratory epithelial cell  
531 mucin release through the G-protein-coupled receptor, GPR99. *Proc Natl*  
532 *Acad Sci U S A* 113(22):6242-6247.

- 533 20. Hamberg M, Svensson J, & Samuelsson B (1975) Thromboxanes: a new  
534 group of biologically active compounds derived from prostaglandin  
535 endoperoxides. *Proc Natl Acad Sci U S A* 72(8):2994-2998.
- 536 21. Samuelsson B (2012) Role of basic science in the development of new  
537 medicines: examples from the eicosanoid field. *J Biol Chem* 287(13):10070-  
538 10080.
- 539 22. Atar S, *et al.* (2006) Atorvastatin-induced cardioprotection is mediated by  
540 increasing inducible nitric oxide synthase and consequent S-nitrosylation of  
541 cyclooxygenase-2. *Am J Physiol Heart Circ Physiol* 290(5):H1960-1968.
- 542 23. Fredman G, *et al.* (2014) Resolvin D1 limits 5-lipoxygenase nuclear  
543 localization and leukotriene B4 synthesis by inhibiting a calcium-activated  
544 kinase pathway. *Proc Natl Acad Sci U S A* 111(40):14530-14535.
- 545 24. Dalli J & Serhan CN (2012) Specific lipid mediator signatures of human  
546 phagocytes: microparticles stimulate macrophage efferocytosis and pro-  
547 resolving mediators. *Blood* 120(15):e60-72.
- 548 25. Werz O, *et al.* (2018) Human macrophages differentially produce specific  
549 resolvin or leukotriene signals that depend on bacterial pathogenicity. *Nat*  
550 *Commun* 9(1):59.
- 551 26. Pistorius K, *et al.* (2018) PDn-3 DPA Pathway Regulates Human Monocyte  
552 Differentiation and Macrophage Function. *Cell Chem Biol* 25(6):749-760  
553 e749.
- 554 27. Vane JR, Flower RJ, & Botting RM (1990) History of aspirin and its  
555 mechanism of action. *Stroke* 21(12 Suppl):IV12-23.
- 556 28. Claria J & Serhan CN (1995) Aspirin triggers previously undescribed bioactive  
557 eicosanoids by human endothelial cell-leukocyte interactions. *Proc Natl Acad*  
558 *Sci U S A* 92(21):9475-9479.
- 559 29. Serhan CN, *et al.* (2002) Resolvins: a family of bioactive products of omega-3  
560 fatty acid transformation circuits initiated by aspirin treatment that counter  
561 proinflammation signals. *J Exp Med* 196(8):1025-1037.
- 562 30. Dalli J, Colas RA, Walker ME, & Serhan CN (2018) Lipid Mediator  
563 Metabolomics Via LC-MS/MS Profiling and Analysis. *Methods Mol Biol*  
564 1730:59-72.
- 565 31. R Development Core Team (2016) R: A language and environment for  
566 statistical computing. ).
- 567 32. Janes KA & Yaffe MB (2006) Data-driven modelling of signal-transduction  
568 networks. *Nat Rev Mol Cell Biol* 7(11):820-828.
- 569

570 **Figure Legends:**

571 **Figure 1: Reduced pre-treatment CSF SPM concentrations are associated**  
572 **with increased disease severity in TBM.** CSF were collected from patients with  
573 TBM before the start of treatment and lipid mediators were extracted, identified and  
574 quantified using lipid mediator profiling. (A) Sum of pro-resolving mediators (DHA-  
575 derived RvD, PD, PCTR, MaR, MCTR; n-3 DPA-derived RvT; RvD<sub>n-3 DPA</sub>, PD<sub>n-3 DPA</sub>,  
576 MaR<sub>n-3 DPA</sub>; EPA-derived RvE; AA-derived LX) (B) Sum of pro-inflammatory  
577 eicosanoids (AA-derived LT, PG, Tx). (C) Resolution index, the ratio between the  
578 sum of pro-resolving mediators and the sum of pro-inflammatory eicosanoids.  
579 Statistical differences were determined using Spearman's correlation. Results are  
580 mean  $\pm$  95% C.I.. n = 44 for MRC grade 1; n = 47 for MRC grade 2 and n = 12 for  
581 MRC grade 3. (D) Pathway interaction analysis down each of the lipid mediator  
582 families. Figure depicts the fold change, expressed as log<sub>2</sub>-fold change, in lipid  
583 mediator concentrations between patients with an MRC grade of 1 (MRC1) and  
584 those with MRC grade of 2 (MRC2) and MRC grade of 3 (MRC3). Scales represent  
585 fold increase or decrease for each mediator family. Mediator families coloured in red  
586 or blue represent those families that were found to be significant regulated. Statistical  
587 significance between mediator concentrations in patients with MRC1 and those with  
588 MRC2 and MRC3 grades was determined using Benjamini-Hochberg multiple testing  
589 correction. Red lines depict pathways that are upregulated, in patients with an MRC  
590 grade of 2 and 3 when compared with MRC1 patients. Blue lines depict pathways  
591 that are downregulated in patients with an MRC grade of 2 and 3 when compared  
592 with MRC1 patients. Pentagons depict the distinct essential fatty acids, squares the  
593 lipid mediator biosynthetic enzymes and circles the distinct lipid mediator families.  
594 DHA = docosahexaenoic acid; n-3 DPA = n-3 docosapentaenoic acid; EPA =  
595 eicosapentaenoic acid; AA = arachidonic acid; ALOX = lipoxygenase; COX =  
596 cyclooxygenase; CYP450 = Cytochrome P450; LTC<sub>4</sub>S = leukotriene C<sub>4</sub> synthase;  
597 GSTM = Glutathione S-transferase Mu; LTA<sub>4</sub>H = Leukotriene A<sub>4</sub> hydrolase; PGS =

598 Prostaglandin synthase; TBXAS1 = thromboxane-A synthase; Rv = resolvins; PD =  
599 Protectins; MaR = Maresins; LX = Lipoxins; LT-Leukotrienes; PG = prostaglandins;  
600 Tx = Thromboxane.

601

602 **Figure 2: TBM disease severity is linked with a switch in the ALOX5 product**

603 **profile.** CSF were collected from patients with TBM before the start of treatment and  
604 lipid mediators were extracted, identified and quantified using lipid mediator profiling.  
605 An interaction network was constructed depicting the number of mediators in each of  
606 the lipid mediator families that were significantly downregulated (blue) or upregulated  
607 (red) in CSF from patients with an MRC grade of 2 and 3 when compared with  
608 patients that had an MRC grade of 1. (B) Box-plot of lipid measurement vs. MRC  
609 grade of 6 lipid mediators which are significantly associated with disease severity. n  
610 = 44 for MRC grade 1; n = 47 for MRC grade 2 and n = 12 for MRC grade 3

611

612

613 **Figure 3: Pre-treatment CSF resolution status is associated with poor outcome**

614 **from TBM.** CSF was collected before the start of treatment and lipid mediators  
615 identified and quantified using lipid mediator profiling. Sum of pro-resolving  
616 mediators; (B) Sum of pro-inflammatory eicosanoids; (C) Resolution index. Statistical  
617 analysis was conducted using one-way ANOVA with Dunnet post-hoc test. Results  
618 are mean  $\pm$  95% C.I. n = 95 survivors and 8 non-survivors. (D) Interaction networks  
619 were constructed to comparing the pre-treatment CSF lipid mediator profiles from  
620 patients that died during the 80-day trial period to those that survived. Scales  
621 represent fold increase or decrease for each mediator family. Mediator families  
622 coloured in red or blue represent those families that were found to be significant  
623 regulated. Statistical significance was determined using Benjamini-Hochberg multiple  
624 testing correction. Results are representative of n = 8 patients. Red lines depict  
625 pathways that are upregulated in non-survivors. Blue lines depict pathways that are



626 downregulated in non-survivors. Pentagons depict the distinct essential fatty acids,  
627 squares the lipid mediator biosynthetic enzymes and circles the distinct lipid mediator  
628 families.

629

630

631 **Figure 4: Death from TBM is associated with a downregulation of CSF ALOX5-**  
632 **derived SPM and an upregulation of ALOX5 derived LTE<sub>4</sub>.**

633 (A) CSF lipid mediator profiles obtained from patients that died during the 80-day  
634 duration of the study (non-survivors) were compared with those that were alive at the  
635 end of the study (survivors) using OPLS-DA (left panel) Score plot. (right panel)  
636 loading plot. (B) Box-plot of lipid measurement vs. 80-day mortality outcome of 6 lipid  
637 mediators which are significant associated with mortality. n = 95 survivors and 8 non-  
638 survivors

639

640 **Figure 5. Aspirin 1000mg/day increases CSF resolution status and reduces**  
641 **CSF TxB<sub>2</sub> concentrations after 30 days of treatment.** CSF fluids were collected  
642 30 days after administration of 81mg, 1000mg aspirin per day or placebo. Lipid  
643 mediators were extracted, identified, quantified using lipid mediator profiling. (A)  
644 cumulative pro-resolving mediator concentrations (B) cumulative pro-inflammatory  
645 eicosanoid concentrations (C) resolution index. (D,E) OPLS-DA of lipid mediator  
646 profiles from patients given (D) 81mg (E) 1000mg aspirin per day in comparison to  
647 those receiving placebo. (*Left panel*) score plot; (*right panel*) loading plot. Mediators  
648 with a VIP score > 1 are identified in red (placebo) green (1000mg aspirin) or blue  
649 (81mg aspirin) circles that denote the association with the placebo and aspirin group.  
650 Results for A-C are mean ± 95% C.I. n = 28 for patients in 81mg aspirin group and n  
651 = 27 patients in 1000mg aspirin group and n = 34 patients in placebo group.

652

653

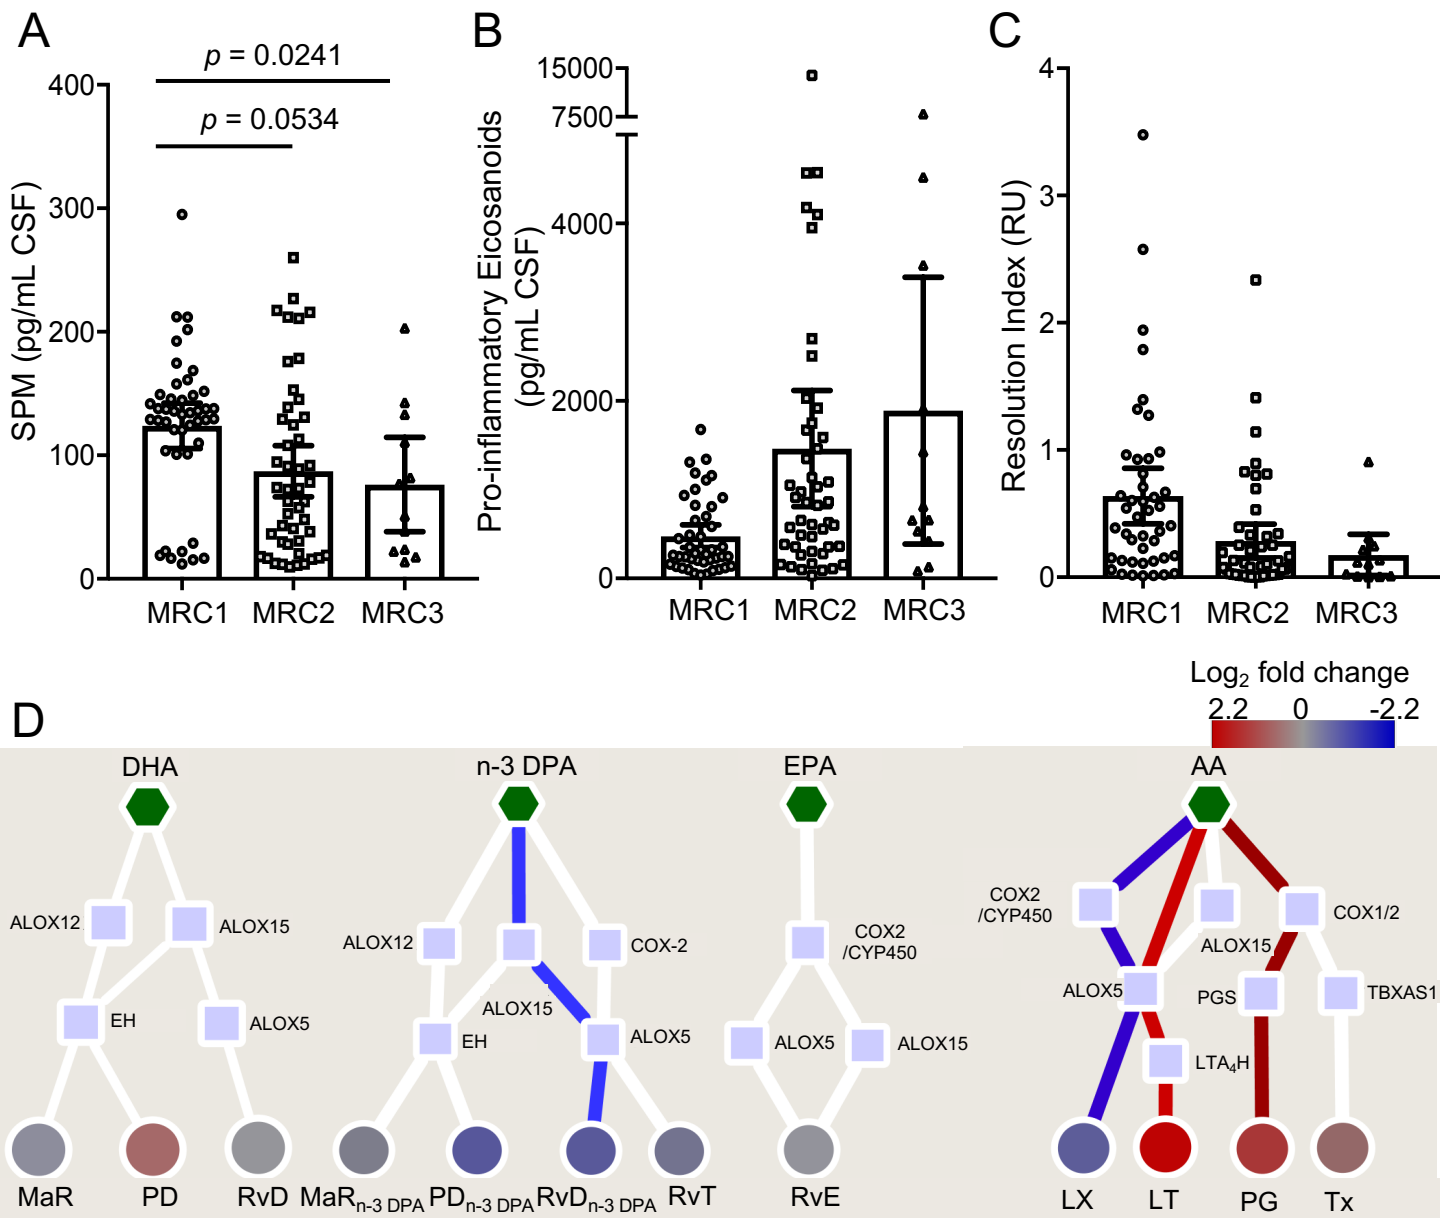

A

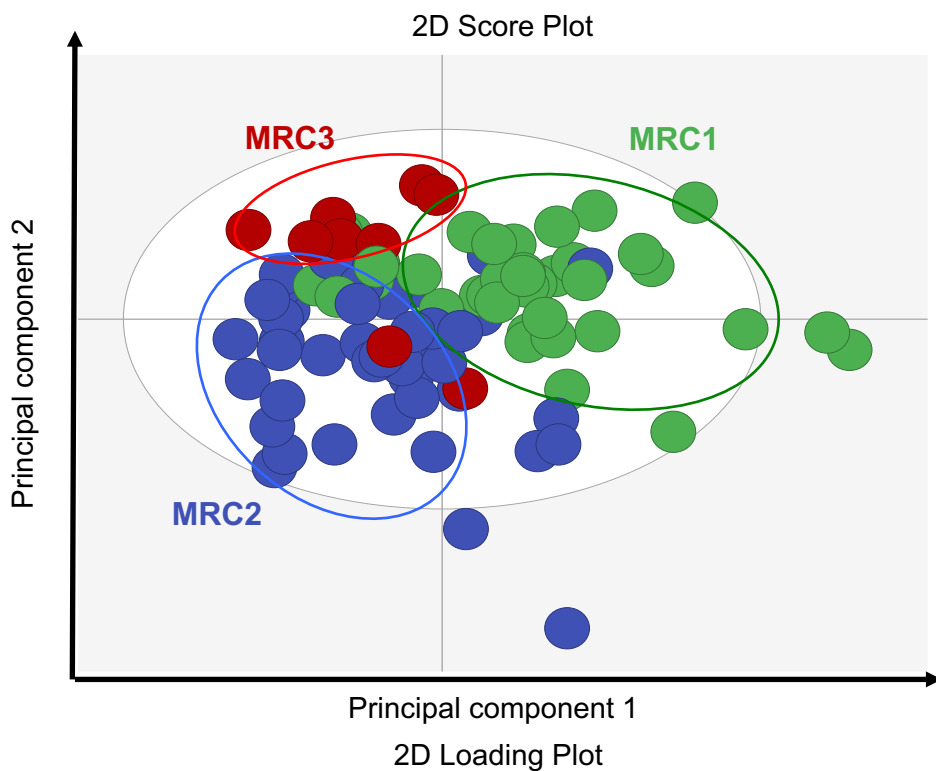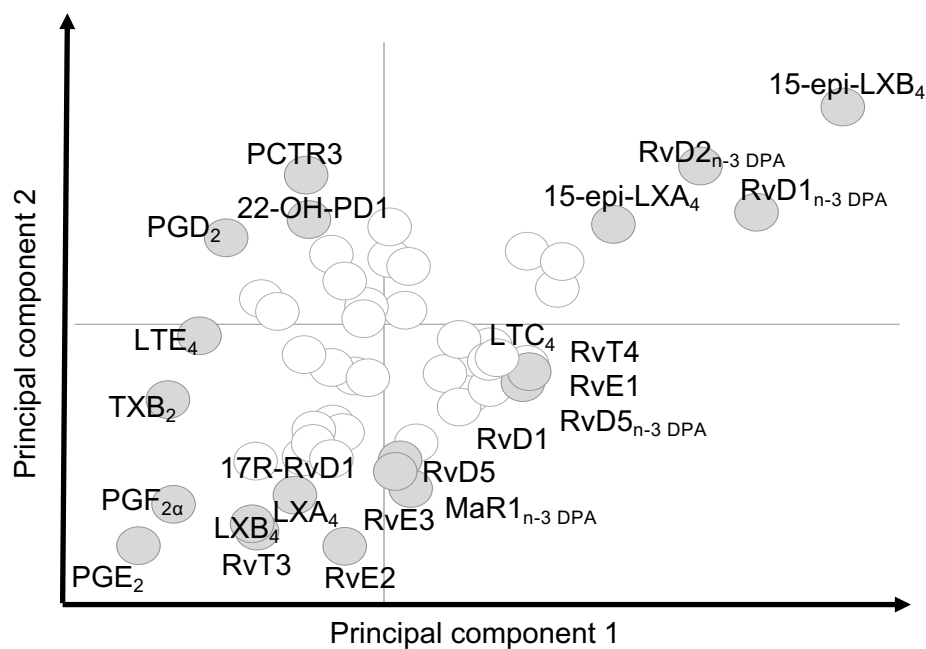

C

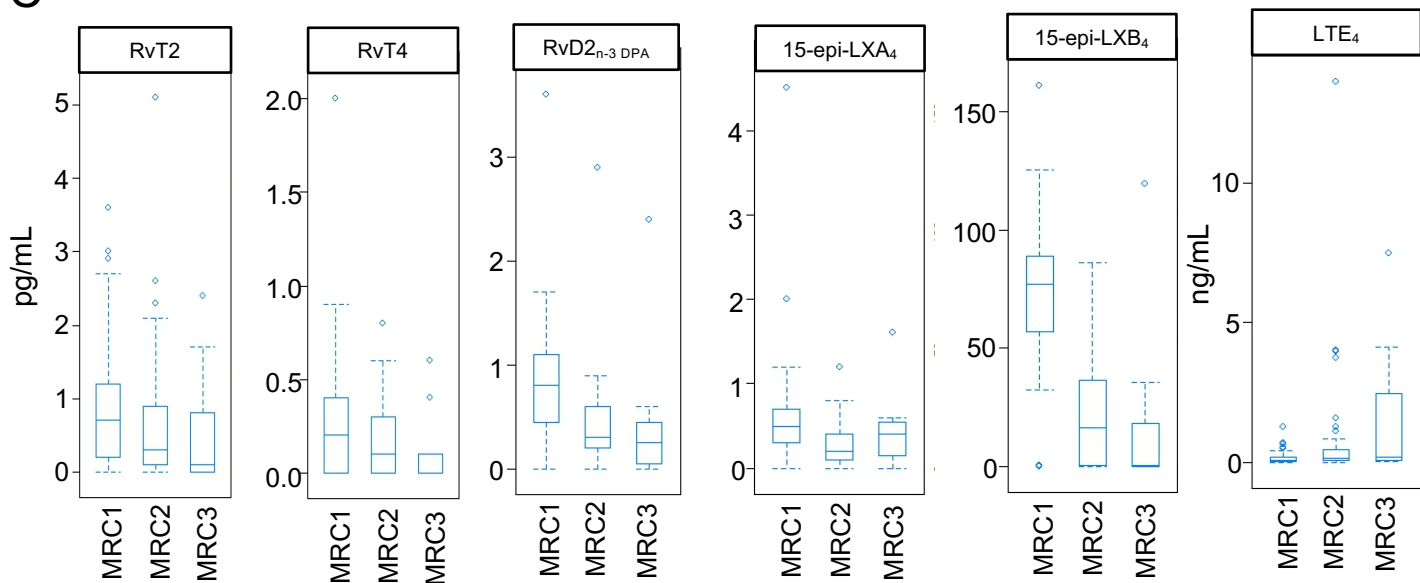

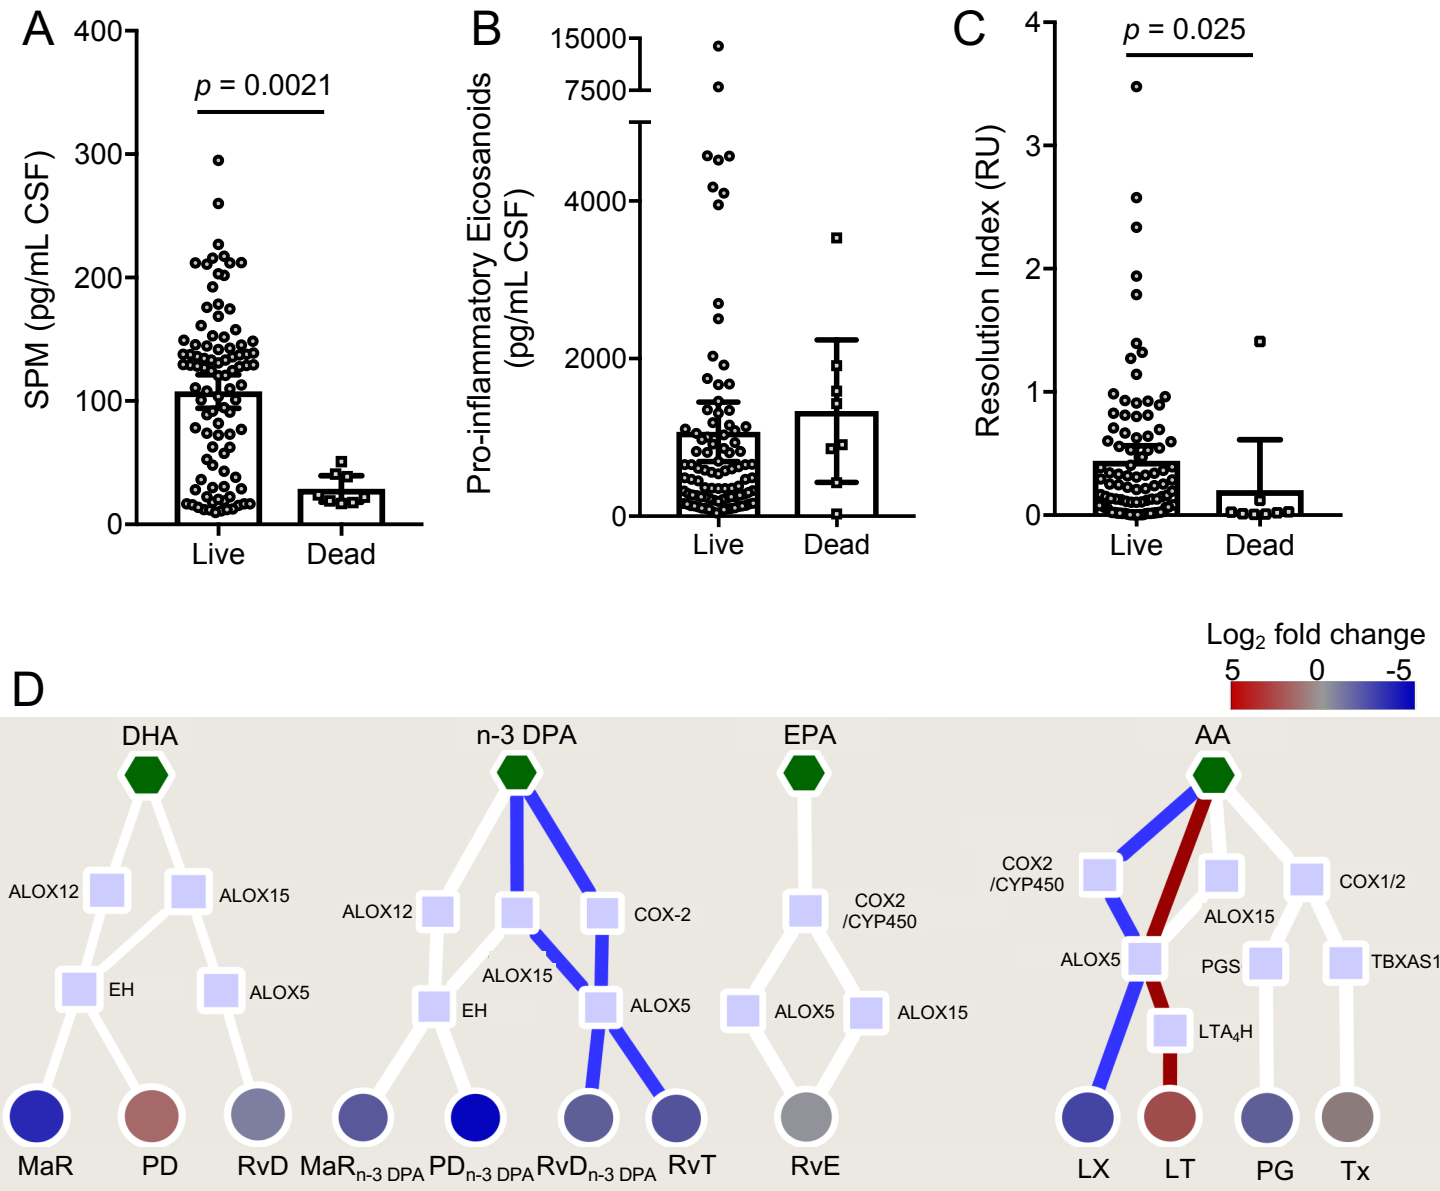

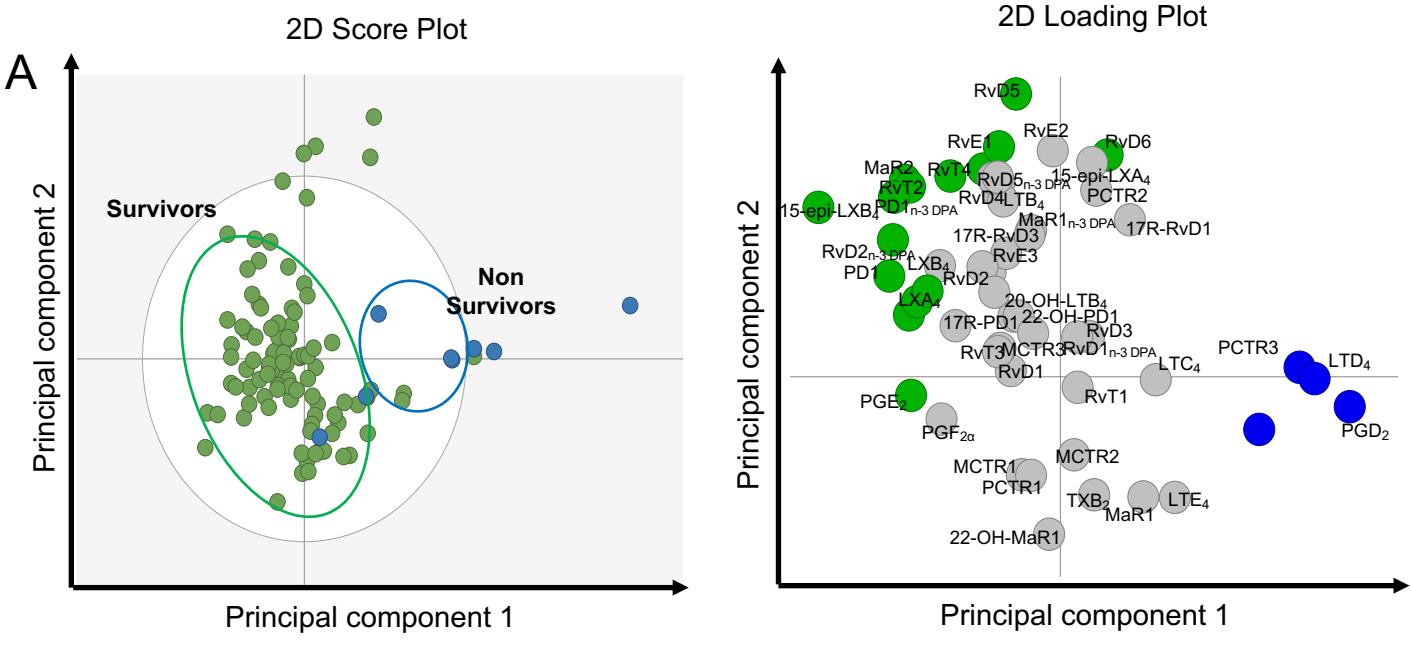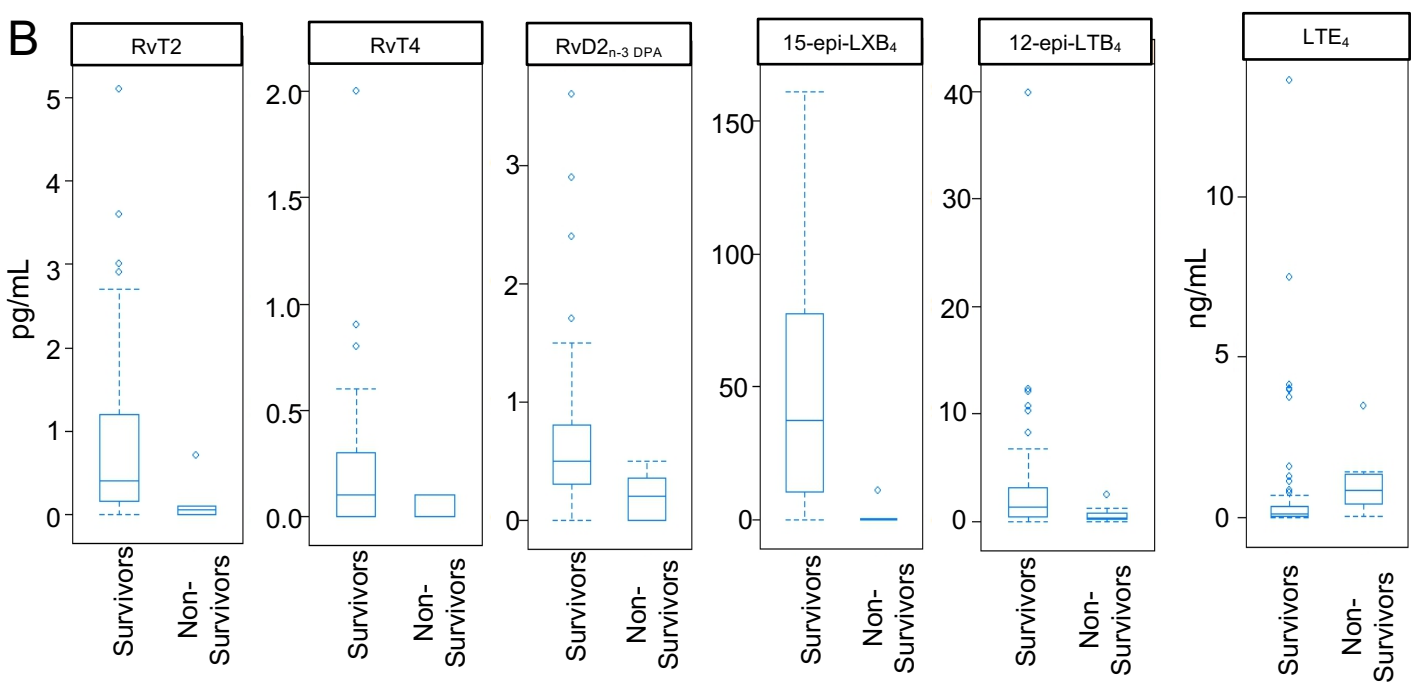

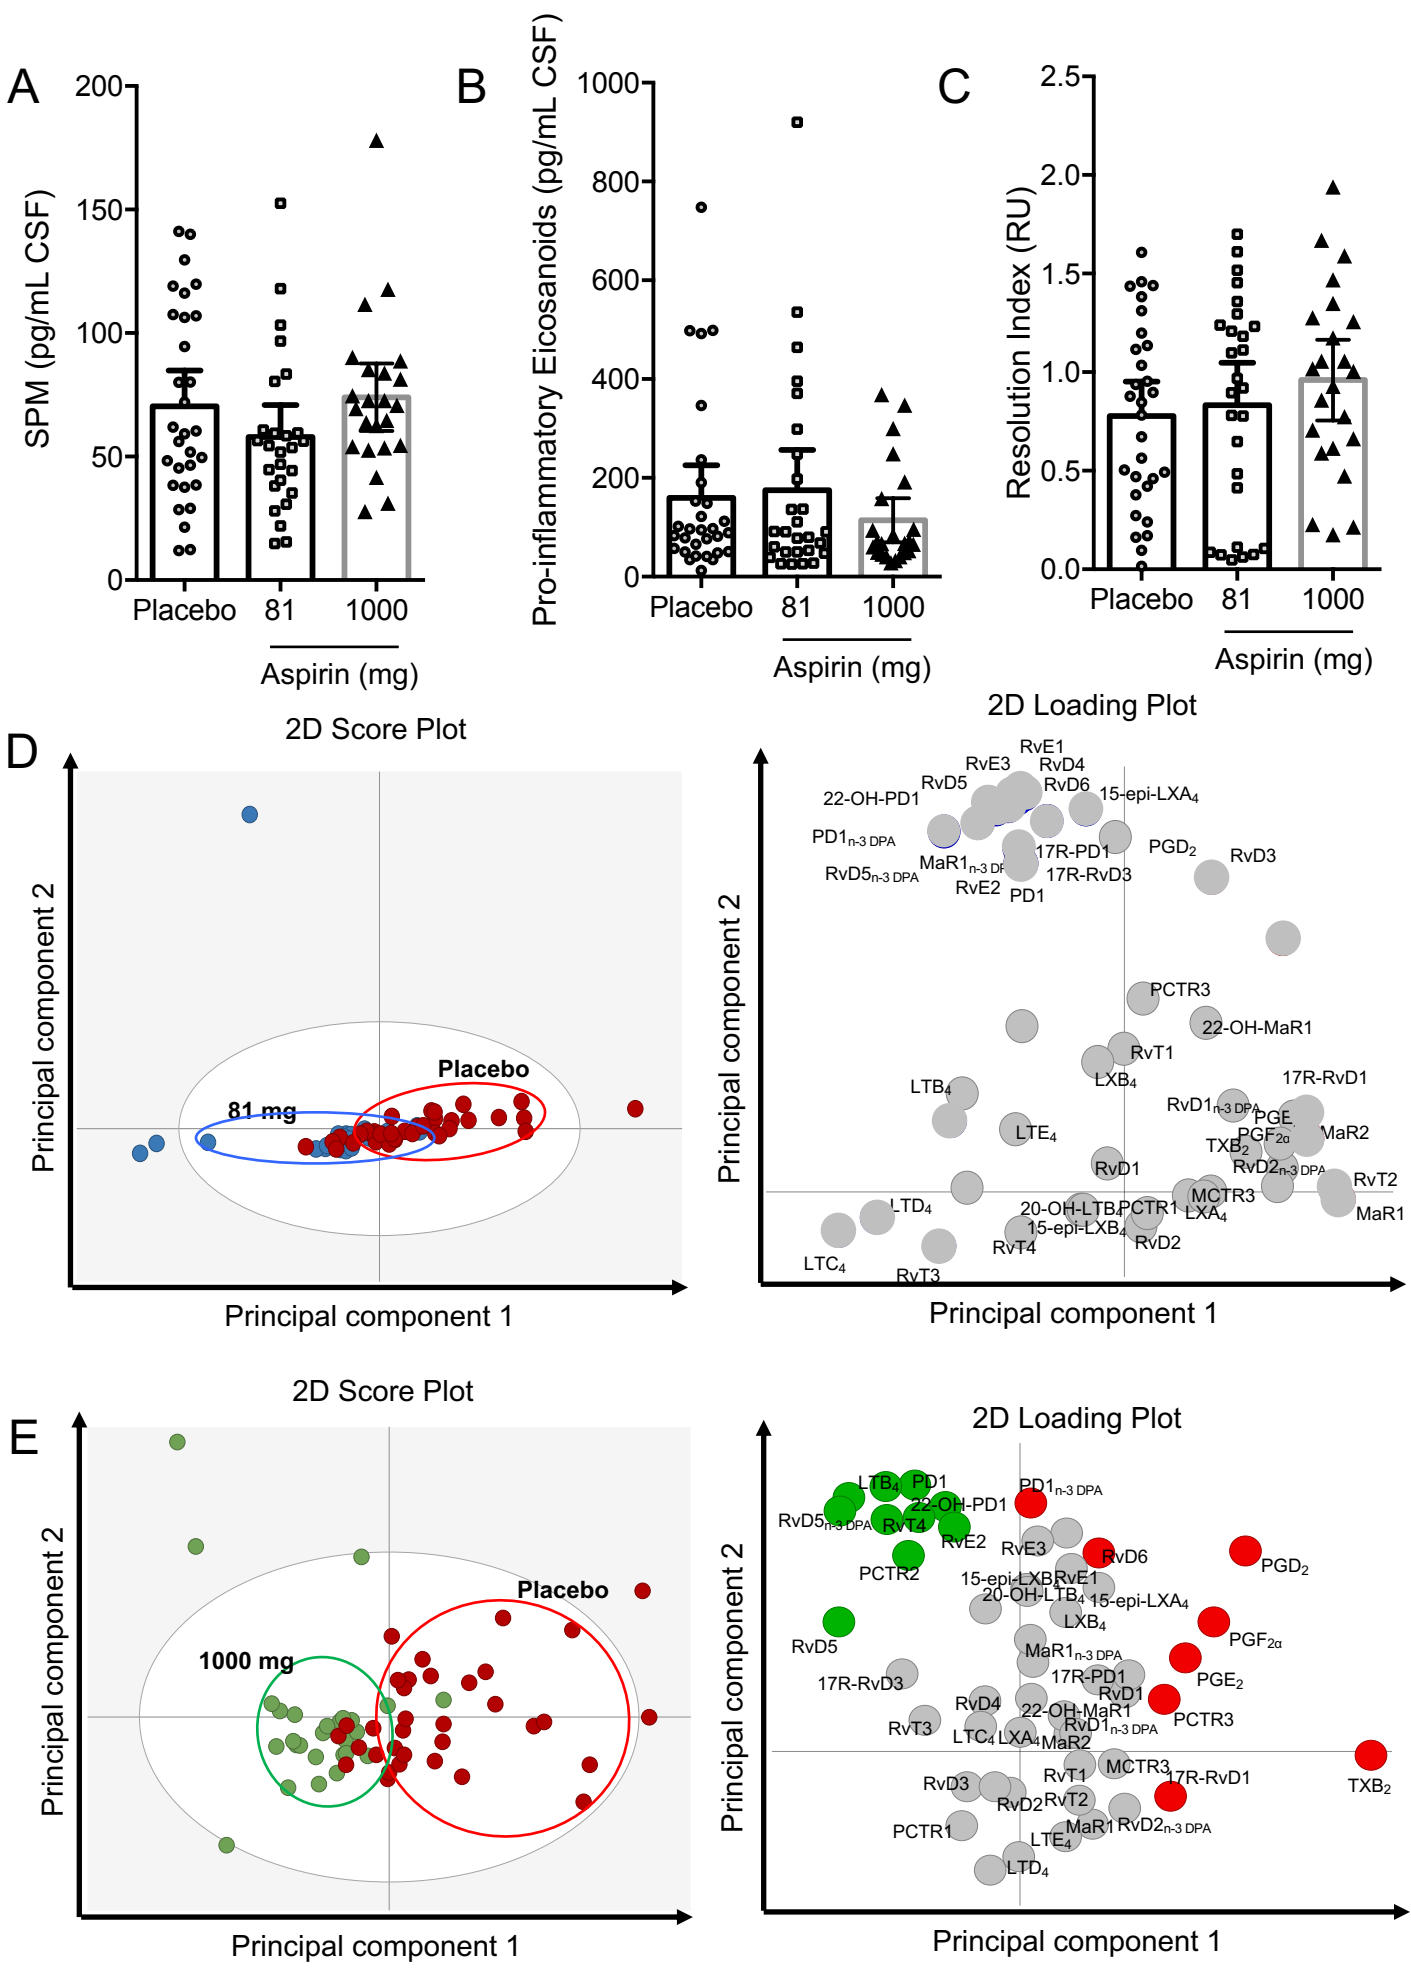

Source: http://biorxiv.org/content/10.1101/608901v1.full.pdf
